# Supplementary material for: An upcycling strategy for polyamide 6: preparing thermoplastic polyamide elastomers from glycolysates produced by controlled degradation
Source: Royal Society of Chemistry journal article supplement (doi:10.1039/d4gc03815k), 2024-12-16
Supplement: d4gc03815k1.pdf [file d4gc03815k1.pdf]

**Supporting Information for**

**An Upcycling Strategy for Polyamide 6: Preparing  
Thermoplastic Polyamide Elastomers from  
Glycolysates Produced by Controlled Degradation**

*Ji Lan, Cong Deng, Ze-Yong Zhao\*, and Yu-Zhong Wang\**

*State Key Laboratory of Polymer Materials Engineering, The Collaborative Innovation Center for Eco-Friendly  
and Fire-Safety Polymeric Materials (MoE), National Engineering Laboratory of Eco-Friendly Polymeric  
Materials (Sichuan), College of Chemistry, Sichuan University, Chengdu 610064, China*

## 1. Supplementary Figures and Tables

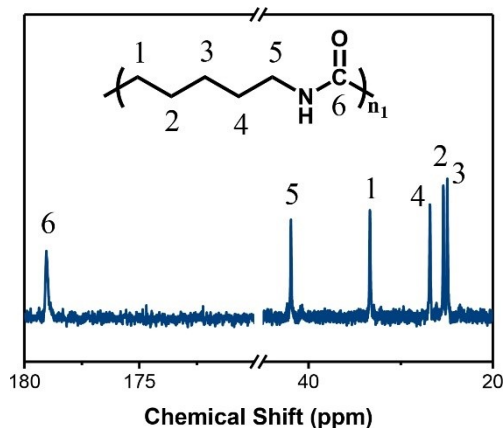

Fig. S1  $^{13}\text{C}$  NMR spectra of PA6-3h-5wt%.

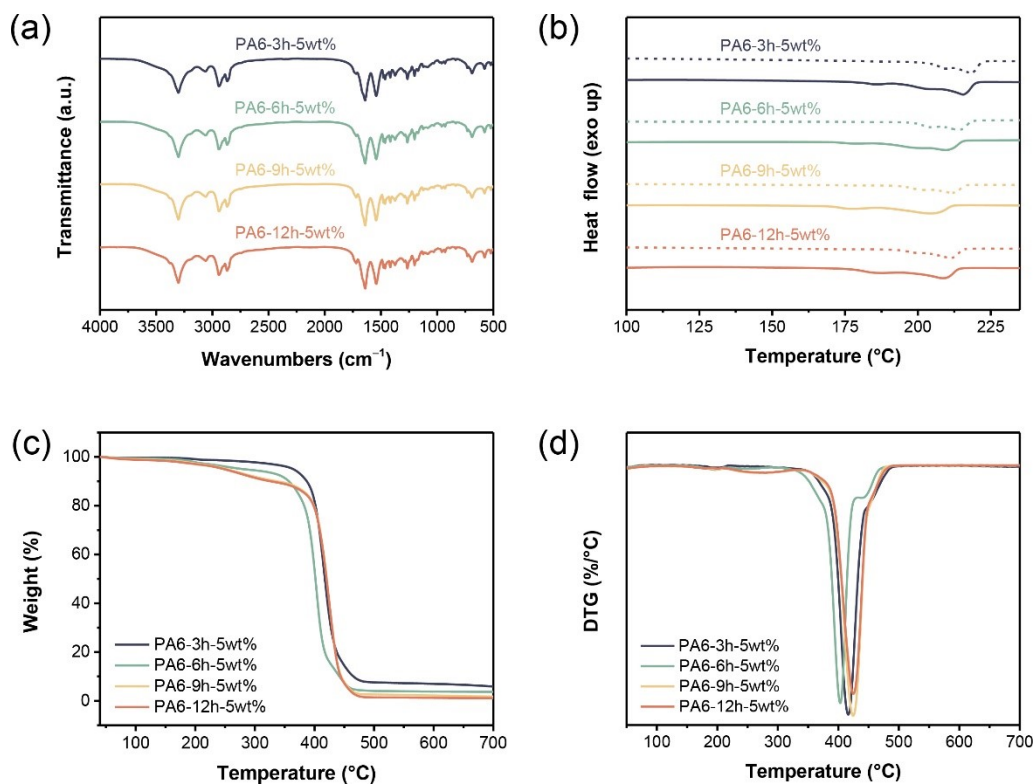

Fig. S2 (a) FTIR spectra of PA6-Xh-5wt%; (b) DSC curves of PA6-Xh-5wt% during the primary and secondary heating (Solid line is primary heating, dashed line is secondary heating); TG (c) and DTG (d) curves of PA6-Xh-5wt% in nitrogen atmosphere.

**Table S1** Melting point and melting range parameters of the DSC curves of PA6-Xh-Ywt% for primary and secondary temperature rise.

| Sample       | Melting point of primary heating (°C) | Melting range of primary heating (°C) | Melting point of secondary heating (°C) | Melting range of secondary heating (°C) |
|--------------|---------------------------------------|---------------------------------------|-----------------------------------------|-----------------------------------------|
| PA6          | 224.0                                 | 209.3 ~ 227.6                         | 221.6                                   | 210.5 ~ 226.3                           |
| PA6-3h-5wt%  | 215.4                                 | 195.8 ~ 220.8                         | 218.2                                   | 203.7 ~ 222.6                           |
| PA6-3h-10wt% | 215.3/188.3                           | 183.4 ~ 219.1                         | 217.9                                   | 202.9 ~ 221.8                           |
| PA6-3h-15wt% | 211.0/190.8                           | 182.7 ~ 217.3                         | 217.4                                   | 199.9 ~ 221.2                           |
| PA6-3h-20wt% | 211.1/190.2                           | 182.5 ~ 216.4                         | 215.9                                   | 196.5 ~ 220.5                           |
| PA6-6h-5wt%  | 209.9                                 | 188.8 ~ 215.9                         | 214.3                                   | 198.2 ~ 218.6                           |
| PA6-9h-5wt%  | 208.9                                 | 178.1 ~ 214.4                         | 212.2                                   | 194.1 ~ 216.7                           |
| PA6-12h-5wt% | 205.1                                 | 169.5 ~ 212.4                         | 211.6                                   | 190.9 ~ 216.2                           |

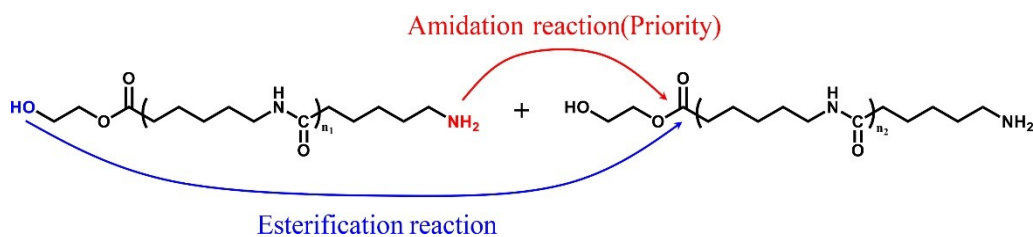

**Scheme S1** Schematic diagram of the mechanism of possible reactions between molecules of PA6 glycolysis oligomers.

**Table S2** TG data of PA6-Xh-Ywt% in N<sub>2</sub>.

| Sample       | $T_{5\%}$ (°C) | $T_{\max}$ (°C) |
|--------------|----------------|-----------------|
| PA6          | 372.2          | 415.7           |
| PA6-3h-5wt%  | 364.0          | 416.3           |
| PA6-3h-10wt% | 325.2          | 408.9           |
| PA6-3h-15wt% | 237.5          | 424.3           |
| PA6-3h-20wt% | 231.6          | 408.5           |
| PA6-6h-5wt%  | 279.9          | 403.4           |
| PA6-9h-5wt%  | 251.9          | 424.2           |
| PA6-12h-5wt% | 247.9          | 426.8           |

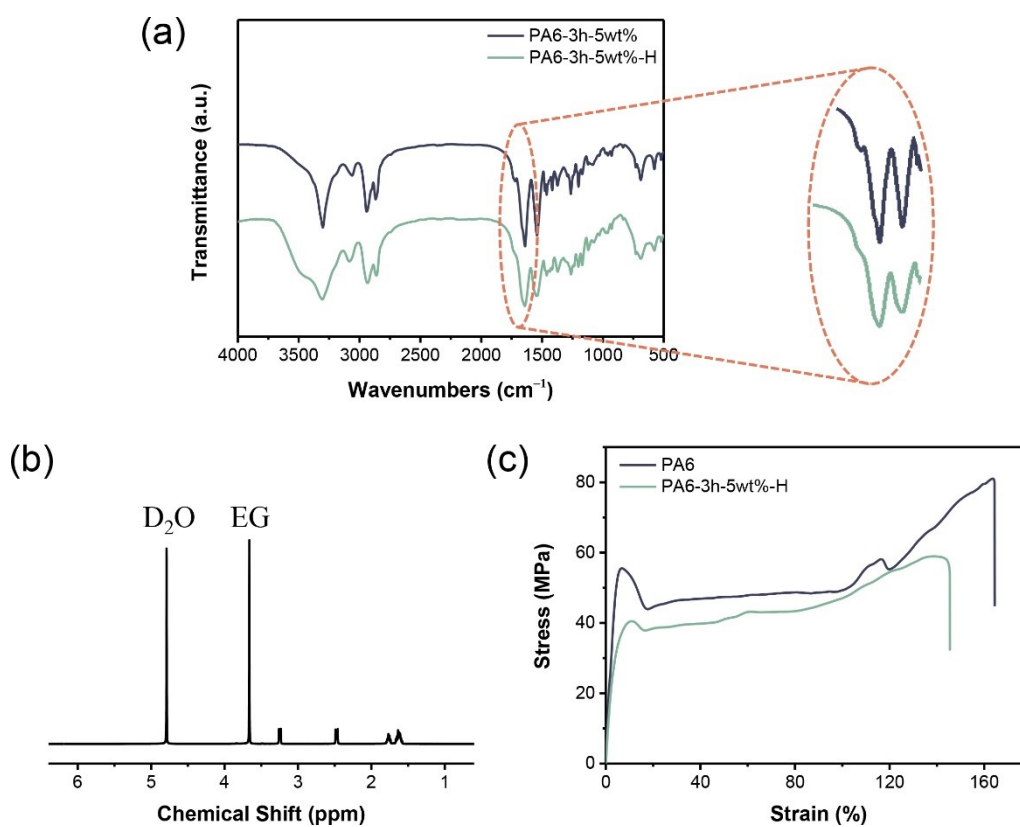

**Fig. S3** (a) FTIR spectra of PA6-3h-5wt% and PA6-3h-5wt%-H; (b) <sup>1</sup>H NMR spectra of volatiles during heating of PA6-3h-5wt%; (c) The tensile stress-strain curves of PA6 and PA6-3h-5wt%-H.

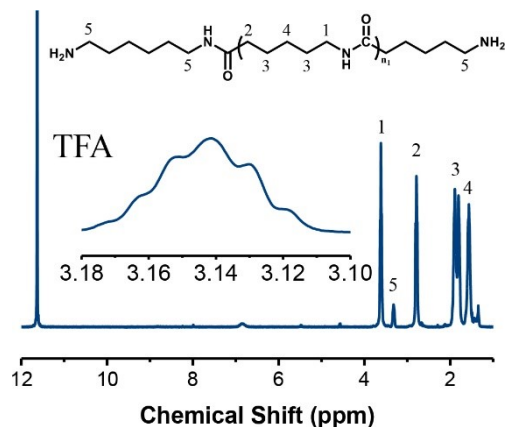

**Fig. S4**  $^1\text{H}$  NMR spectra of PA6-3h-5wt $\%$ -N.

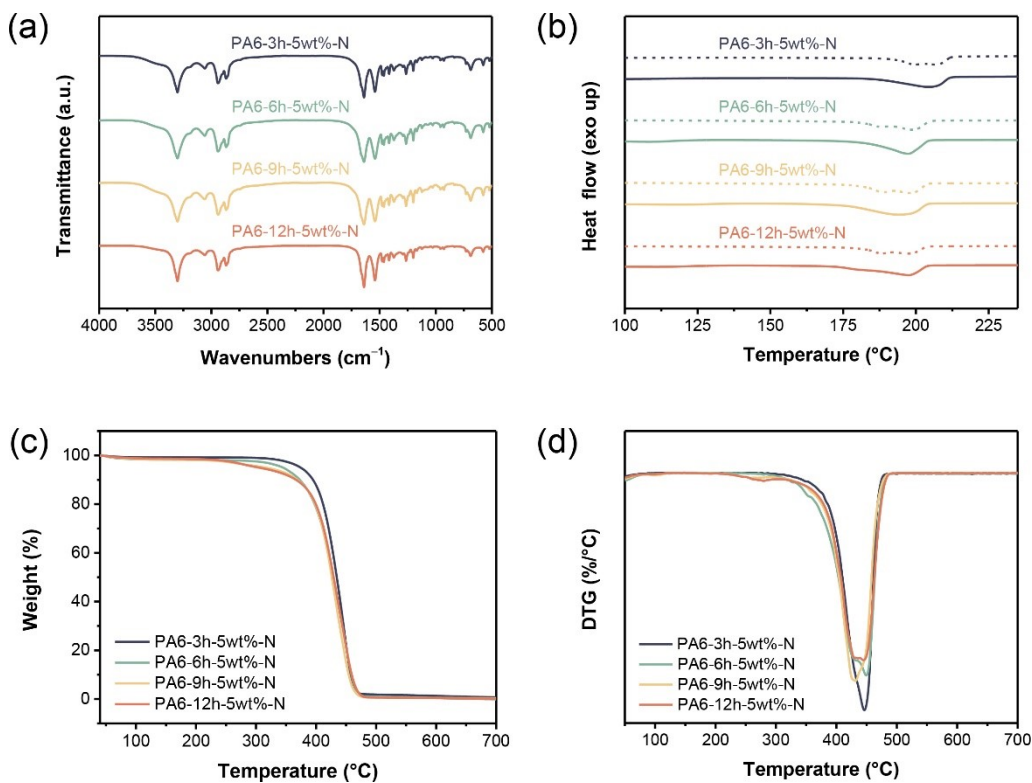

**Fig. S5** (a) FTIR spectra of PA6-Xh-5wt $\%$ -N; (b) DSC curves of PA6-Xh-5wt $\%$ -N during the primary and secondary heating (Solid line is primary heating, dashed line is secondary heating); TG (c) and DTG (d) curves of PA6-Xh-5wt $\%$ -N in nitrogen atmosphere.

**Table S3** The melting points of PA6-Xh-Ywt%-N. (Notes:  $T_{m1}$  and  $T_{m2}$  correspond to the DSC primary and secondary heating melting points of PA6-Xh-Ywt%-N respectively.)

| Sample         | $T_{m1}$ (°C) | $T_{m2}$ (°C) |
|----------------|---------------|---------------|
| PA6-3h-5wt%-N  | 205.9         | 206.6         |
| PA6-3h-10wt%-N | 201.6         | 201.8         |
| PA6-3h-15wt%-N | 195.0         | 195.8         |
| PA6-3h-20wt%-N | 190.3         | 191.7         |
| PA6-6h-5wt%-N  | 197.6         | 199.1         |
| PA6-9h-5wt%-N  | 195.2         | 198.3         |
| PA6-12h-5wt%-N | 197.8         | 197.6         |

**Table S4** TG data of PA6-Xh-Ywt%-N in  $N_2$ .

| Sample         | $T_{5\%}$ (°C) | $T_{max}$ (°C) |
|----------------|----------------|----------------|
| PA6-3h-5wt%-N  | 368.1          | 446.3          |
| PA6-3h-10wt%-N | 359.4          | 434.3          |
| PA6-3h-15wt%-N | 310.2          | 452.7          |
| PA6-3h-20wt%-N | 286.3          | 450.0          |
| PA6-6h-5wt%-N  | 345.2          | 448.7          |
| PA6-9h-5wt%-N  | 316.0          | 432.3          |
| PA6-12h-5wt%-N | 304.9          | 445.0          |

**Table S5**  $M_n$ ,  $M_\eta$  and GD of PA6-Xh-Ywt%-N.

| Sample         | $M_\eta$ (g/mol) | $M_n$ (g/mol) | GD (%)     |
|----------------|------------------|---------------|------------|
| PA6-3h-5wt%-N  | 2374 ± 41        | 1873 ± 55     | 23.4 ± 0.8 |
| PA6-3h-10wt%-N | 2278 ± 63        | 1679 ± 52     | 33.5 ± 0.6 |

|                |           |           |            |
|----------------|-----------|-----------|------------|
| PA6-3h-15wt%-N | 2208 ± 35 | 1436 ± 42 | 40.0 ± 0.9 |
| PA6-3h-20wt%-N | 2120 ± 55 | 1344 ± 38 | 45.1 ± 1.2 |
| PA6-6h-5wt%-N  | 2340 ± 42 | 1790 ± 45 | 32.8 ± 0.8 |
| PA6-9h-5wt%-N  | 2270 ± 61 | 1675 ± 40 | 37.2 ± 1.0 |
| PA6-12h-5wt%-N | 2259 ± 54 | 1601 ± 35 | 40.5 ± 1.1 |

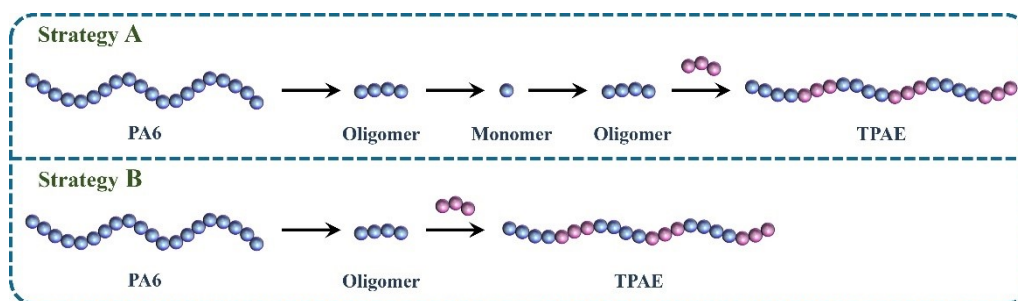

**Fig. S6** The reaction routes to be followed for the preparation of TPAE by PA6 monomer (Strategy A) and oligomer (Strategy B) recycling methods.

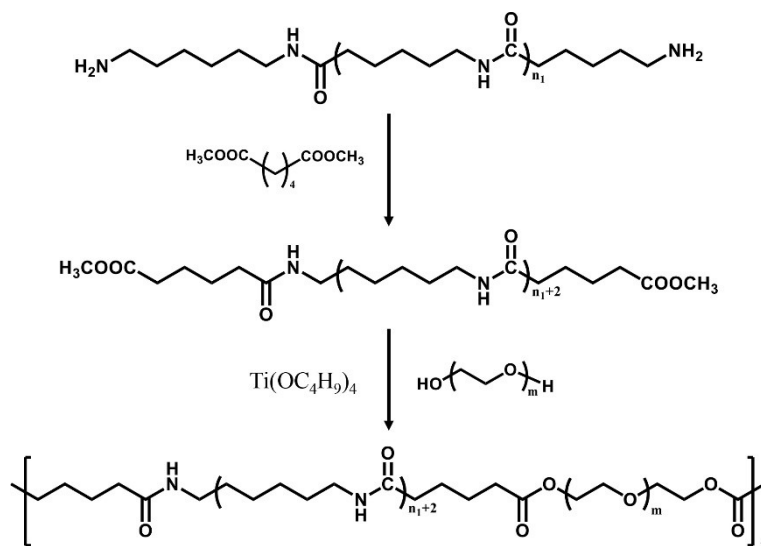

**Scheme S2** The synthesis route of TPAEs.

**Table S6** Thermal parameters of TPAEs. (Notes:  $T_{ms}$  and  $\Delta H_{ms}$  are thermal parameters of soft

segment PEG,  $T_{mH}$  and  $\Delta H_{mH}$  are thermal parameters of hard segment PA.)

| Sample | $T_{mS}$ (°C) | $\Delta H_{mS}$ (J/g) | $T_{mH}$ (°C) | $\Delta H_{mH}$ (J/g) |
|--------|---------------|-----------------------|---------------|-----------------------|
| T1     | 10.4          | 7.0                   | 194.0         | 28.4                  |
| T2     | 9.6           | 5.7                   | 192.3         | 28.9                  |
| T3     | 8.1           | 10.0                  | 190.2         | 29.8                  |
| T4     | 7.9           | 9.4                   | 189.1         | 27.9                  |

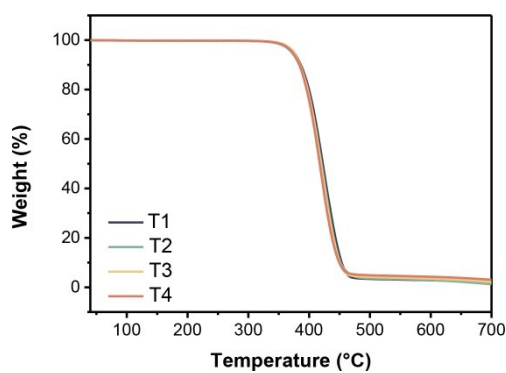

**Fig. S7** TG curves of TPAEs.

**Table S7** TG data of TPAEs in  $N_2$ .

| Sample | $T_{5\%}$ (°C) | $T_{max}$ (°C) |
|--------|----------------|----------------|
| T1     | 374.9          | 424.3          |
| T2     | 371.4          | 427.5          |
| T3     | 374.7          | 420.5          |
| T4     | 372.9          | 419.0          |

**Table S8** Tensile data for TPAEs.

| Sample | Young's modulus | Elongation at break | Fracture strength |
|--------|-----------------|---------------------|-------------------|
|--------|-----------------|---------------------|-------------------|



|    | (MPa)       | (%)      | (MPa)      |
|----|-------------|----------|------------|
| T1 | 210.7 ± 8.1 | 732 ± 67 | 40.9 ± 2.3 |
| T2 | 176.1 ± 7.8 | 697 ± 50 | 36.2 ± 1.5 |
| T3 | 138.2 ± 6.8 | 580 ± 73 | 28.7 ± 2.8 |
| T4 | 116.5 ± 4.5 | 807 ± 54 | 35.6 ± 1.5 |

**Table S9** Mechanical Properties Summary of TPAE Prepared by PA6.

| Materials (Ref.)    | Fracture strength (MPa) | Elongation at break (%) |
|---------------------|-------------------------|-------------------------|
| PA6-PEG (This work) | 28.7–40.9               | 580–807                 |
| PA6-PTMG (Ref. 31)  | 33–61                   | 384–1220                |
| PA6-PTMG (Ref. 32)  | 25–38                   | 225–455                 |
| PA6-PEG (Ref. 34)   | 15.3–27.0               | 125–508                 |
| PA6-PEG (Ref. 35)   | 22.2–44.7               | 245–343                 |
| PA6-PTMG (Ref. 38)  | 29–63                   | 93–514                  |
| PA6-PTMG (Ref. 39)  | 35.9                    | 580                     |
| PA6-PTMG (Ref. 40)  | About 32–55             | About 670–1100          |

## 2. Techno-economic analysis (TEA)

### 2.1. Introduction to TEA

#### 2.1.1. Analysis methods and indicators

TEA is a methodology used to evaluate technical projects, programs or decisions to determine their economic feasibility. In this study, the Annuity Techno Economic Assessment Method (ATEM)<sup>1</sup> is used to estimate the cost. The annualized capital investment cost ACC is calculated

as follows, assuming that the annualized investment cost ACC is borrowed and repaid over the life of the plant at a specified loan rate.

$$ACC = FCI \times \frac{NIR \times (1 + NIR)^N}{(1 + NIR)^N - 1}$$

The total production cost is calculated as follows:

$$C_{total} = \frac{(ACC + CCOP)}{Annual\ Production}$$

### 2.1.2. Analytical Steps

In order to evaluate the economic feasibility of TPAE production from PA6 glycolysates, a TEA of the TPAE production process was carried out on the basis of test yields. The cost-benefit analysis included the following main steps:

(1) Define the objectives and scope of the project: Define the main objectives of the project and the scope to be covered. Clarifying the specific objectives of the project is critical to the direction and content of the subsequent analysis.

(2) Determination of costs and benefits: All costs associated with the project are collected, including investment costs (e.g., equipment purchase, construction costs, labor costs, etc.) and operational costs (e.g., maintenance costs, operation and management costs, etc.). At the same time, the life cycle costs of the project are considered, including the costs of the investment phase, the operation phase and the waste treatment phase. Finally, the expected economic benefits of the project are evaluated.

(3) Discounting costs and benefits to current values: Future costs and benefits are discounted to current values, taking into account the effect of time value. This is done to ensure that changes

in the time value of money are taken into account when comparing costs and benefits. Comparing costs and benefits: comparing the total costs of a project with the total benefits.

## 2.2. Definition of objective and scope

### 2.2.1. Introduction to the product manufacturing process

This study contains the fabrication of two products, the study case is the preparation of TPAE from the PA6 glycolysates in this work (T1). The comparison case is the preparation of TPAE (T1-CL) with exactly the same ratio of soft and hard segments as T1 by the one-pot method using CL monomer as the raw material.

Study case process description: Reaction route for the conversion of waste PA6 to thermoplastic polyamide elastomers. The reaction was carried out at 200 °C and atmospheric pressure with waste PA6, EG and H<sub>3</sub>PO<sub>4</sub> for 3 h. The reaction was cooled and filtered, and the liquid portion, which consisted mainly of EG and H<sub>3</sub>PO<sub>4</sub>, was reused (the process included a 10 wt% loss), while the solid portion (PA6 oligomers) was washed and dried (the process included a 20 wt% loss of the PA6 oligomers). The PA6 oligomers were then reacted with HMDA, DMA, PEG<sub>1000</sub>, and the catalyst Ti(OC<sub>4</sub>H<sub>9</sub>)<sub>4</sub> to obtain TPAE, respectively. The process was simplified to include a reaction at 220 °C for 3 h at atmospheric pressure, and a decompression for 3 h at 240 °C for 100 pa.

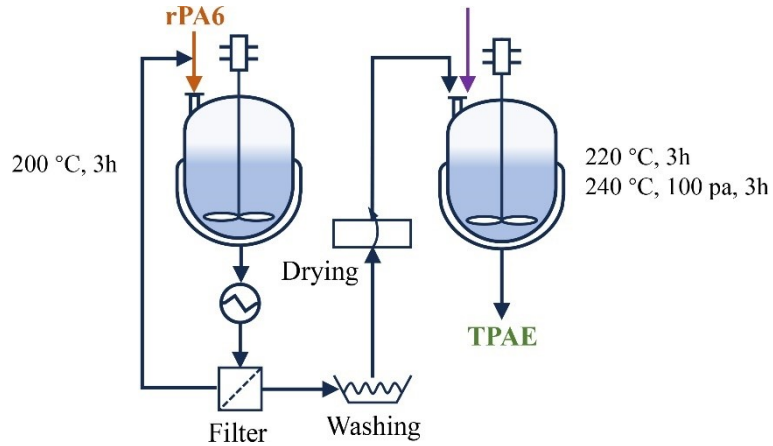

**Fig. S8** Manufacturing Process of study case.

Comparison case process description: TPAE prepared by one-pot method, using water as the ring-opening agent to open the ring of caprolactam and adipic acid as the capping agent, the end-carboxylated PA6 oligomers were prepared first, and then the polyethylene glycol was added directly to react with the catalyst tetrabutyl titanate to obtain the TPAE. the process was simplified to 220 °C reaction for 7 h, and 240 °C decompression to 100 pa reaction for 3 h. The process was simplified by the use of a single-step process, which was carried out in the same way as that of the TPAE.

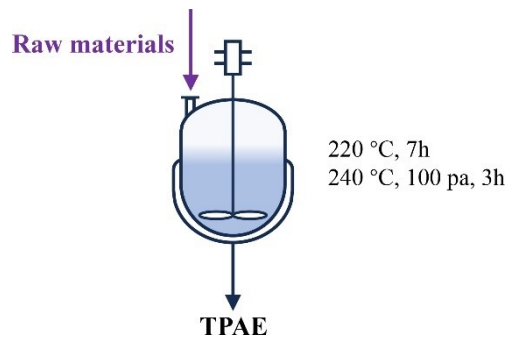

**Fig. S9** Manufacturing Process of comparison case.

### 2.2.2. Basic assumptions for technical and economic evaluation

**Table S10** Basic assumptions for TEA (Study Case).

| Parameters                                             | Value      | Units          | Ref                       |
|--------------------------------------------------------|------------|----------------|---------------------------|
| Annual operating hours                                 | 8000       | h/y            |                           |
| Plant life (N)                                         | 20         | y              |                           |
| NIR                                                    | 10         | %              |                           |
| Scale (Annual production of TP AE)                     | 1000000    | t              |                           |
| Scale (Yield of TP AE)                                 | 125        | t/h            | a                         |
| No. of equipment                                       | 100        |                |                           |
| Mass flow rate to and from a single full mixing kettle | 6.41       | t/h            | b                         |
| EG flow rate of single full mixing kettle              | 5.46       | t/h            | c                         |
| Feed ratio of PA6: EG: H <sub>3</sub> PO <sub>4</sub>  | 1: 6: 0.05 |                |                           |
| Volume of a single full mixing kettle                  | 25         | m <sup>3</sup> |                           |
| Volume of a single intermittent stirred-tank kettle    | 10         | m <sup>3</sup> |                           |
| Discount rate of EG and H <sub>3</sub> PO <sub>4</sub> | 10         | %              |                           |
| Recycled PA6                                           | 400        | \$/t           | 2                         |
| EG                                                     | 621        | \$/t           | 3                         |
| H <sub>3</sub> PO <sub>4</sub>                         | 1315       | \$/t           | 4                         |
| HMDA                                                   | 2279       | \$/t           | 5                         |
| DMA                                                    | 1616       | \$/t           | 6                         |
| Ti(OC <sub>4</sub> H <sub>9</sub> ) <sub>4</sub>       | 3176       | \$/t           | 7                         |
| PEG <sub>1000</sub>                                    | 1120       | \$/t           | 8                         |
| Electricity price                                      | 0.042      | \$/kwh         | 9                         |
| Area of a single heat exchanger                        | 13.644     | m <sup>2</sup> | Aspen simulations yielded |
| Reference reactor power                                | 23         | kw             |                           |
| Reference reactor volume                               | 10         | m <sup>3</sup> |                           |
| Lang factor                                            | 3.63       |                | 10                        |

a: Yield of TP AE (t/h) = Annual output of TP AE (1000000 t)/Annual operating hours (8000 h) = 125 t/h

b: Mass flow rate to and from a single full mixing kettle (t/h) = Logistics rPA6 flow rate (90.96 t/h)\*(1+6+0.05)/No. of equipment (100) = 6.41 t/h

The rPA6 flow rates are detailed in Table S18.

c: EG flow rate of single full mixing kettle(t/h) = Logistics rPA6 flow rate (90.96 t/h)\*6/No. of equipment (100)=5.46 t/h

**Table S11** Basic assumptions for TEA (Comparison case).

| Parameters                                          | Value   | Units          | ref |
|-----------------------------------------------------|---------|----------------|-----|
| Annual operating hours                              | 8000    | h/y            |     |
| Plant life(N)                                       | 20      | y              |     |
| NIR                                                 | 10      | %              |     |
| Scale (Annual production of TPAE)                   | 1000000 | t              |     |
| Scale (Yield of TPAE)                               | 125     | t/h            | a   |
| No. of equipment                                    | 100     |                |     |
| Volume of a single intermittent stirred-tank kettle | 15      | m <sup>3</sup> |     |
| AA                                                  | 1385    | \$/t           | 11  |
| Ti(OC <sub>4</sub> H <sub>9</sub> ) <sub>4</sub>    | 3176    | \$/t           | 7   |
| PEG <sub>1000</sub>                                 | 1120    | \$/t           | 8   |
| CL                                                  | 1895    | \$/t           | 12  |
| Electricity price                                   | 0.042   | \$/kwh         | 9   |
| Reference reactor power                             | 23      | kw             |     |
| Reference reactor volume                            | 10      | m <sup>3</sup> |     |
| Lang factor                                         | 3.63    |                | 10  |

a: Yield of TPAE (t/h) = Annual output of TPAE (1000000 t)/Annual operating hours (8000 h) = 125 t/h

### 2.3. Cost

The system cost mainly includes investment cost and operation cost, the investment cost includes equipment purchase, construction cost and contingency cost, etc., the operation cost includes labor cost, maintenance cost, material and utility cost and management cost, etc., the cost analysis in this paper refers to the literature framework.<sup>13, 14</sup> The life cycle cost of the project is considered, including the cost of the investment phase and the operation phase.

#### 2.3.1. Capital cost

**Table S12** Calculation and reference of system capital cost (Study Case).

| CAPITAL COSTS                      | Value     | Units | Ref              |
|------------------------------------|-----------|-------|------------------|
| ISBL                               | 105756307 | \$    | Table S13        |
| OSBL                               | 42302523  | \$    | 40%of ISBL       |
| Engineering and construction costs | 14805883  | \$    | 10% of ISBL+OSBL |
| Contingency charges                | 14805883  | \$    | 10% of ISBL+OSBL |
| Fixed Capital Investment (FCI)     | 177670595 | \$    | Sum above        |

**Table S13** Equipment cost (Study Case).

| Equipment                        | Unit value | Units | Value     | Units | Ref                                                                        |
|----------------------------------|------------|-------|-----------|-------|----------------------------------------------------------------------------|
| Full mixing kettle               | 291692     | \$    | 29169167  | \$    | a                                                                          |
| Intermittent stirred-tank kettle | 207819     | \$    | 20781946  | \$    | a                                                                          |
| Heat exchanger                   | 23310      | \$    | 2330999   | \$    | a                                                                          |
| Filtrator                        | 5960       | \$    | 596041    | \$    | a (1 t = 2204.6 lb)                                                        |
| Install                          |            |       | 191947697 | \$    | =Lang factor* (Reaction kettle + Heat exchanger + Filtrator) <sup>10</sup> |
| Total plant ISBL                 |            |       | 29169167  | \$    | Sum above                                                                  |

a: The parameters related to the reference equipment are shown in Table S14, other parameters are shown in Table S10, and the equipment costing formula is as follows<sup>15</sup>:

$$\text{Equipment cost} = \text{ref cost} * \left( \frac{\text{scale}}{\text{ref capacity}} \right)^{\text{scaling factor}}$$

Total equipment price (\$) = The price of a single device (\$) \* No. of equipment (100)

**Table S14** Equipment parameters (Study Case).

| Equipment      | Reaction kettle <sup>10</sup> | Heat exchanger <sup>16</sup> | Filtrator <sup>17</sup> |
|----------------|-------------------------------|------------------------------|-------------------------|
| Ref cost (\$)  | 68597                         | 20908                        | 2795                    |
| Ref scale      | 0.5 m <sup>3</sup>            | 10 m <sup>2</sup>            | 8000 lb/h               |
| Scaling factor | 0.37                          | 0.35                         | 1.33                    |

**Table S15** Calculation and reference of system capital cost (Comparison case).

| CAPITAL COSTS                      | Value     | Units | REF              |
|------------------------------------|-----------|-------|------------------|
| ISBL                               | 111794639 | \$    | Table S16        |
| OSBL                               | 44717856  | \$    | 40% of ISBL      |
| Engineering and construction costs | 15651249  | \$    | 10% of ISBL+OSBL |
| Contingency charges                | 15651249  | \$    | 10% of ISBL+OSBL |
| Fixed Capital Investment (FCI)     | 187814994 | \$    | Sum above        |

**Table S16** Equipment cost (Comparison case).

| Equipment                        | Unit value | Unit | Value     | Units | Ref                                          |
|----------------------------------|------------|------|-----------|-------|----------------------------------------------|
| Intermittent stirred-tank kettle | 241457     | \$   | 24145710  | \$    | a                                            |
| Install                          |            |      | 87648929  | \$    | =Lang factor*(Reaction kettle) <sup>10</sup> |
| Total plant ISBL                 |            |      | 111794639 | \$    | Sum above                                    |

a: The parameters related to the reference equipment are shown in Table S17 other parameters are shown in Table S11, and the equipment costing formula is as follows<sup>15</sup>:

$$\text{Equipment cost} = \text{ref cost} * \left( \frac{\text{scale}}{\text{ref capacity}} \right)^{\text{scaling factor}}$$

**Table S17** Equipment parameters (Comparison Case).

| Equipment                     | Ref cost (\$) | Ref scale          | Scaling factor |
|-------------------------------|---------------|--------------------|----------------|
| Reaction kettle <sup>10</sup> | 68597         | 0.5 m <sup>3</sup> | 0.37           |

### 2.3.2. Operating cost

**Table S18** Logistics data (Study Case).

| □     | Parameters                     | Value | Units | Value  | Units | Note                      |
|-------|--------------------------------|-------|-------|--------|-------|---------------------------|
|       | rPA6                           | 100   | t     | 90.96  | t/h   | a                         |
|       | EG                             | 6     | t     | 5.46   | t/h   | 10% loss rate             |
| Input | H <sub>3</sub> PO <sub>4</sub> | 0.05  | t     | 0.0455 | t/h   | 10% loss rate             |
|       | HMDA                           | 5.54  | t     | 5.04   | t/h   | 110% theoretical addition |
|       | DMA                            | 16.8  | t     | 15.28  | t/h   | 110% theoretical addition |



|        |                                                  |        |   |       |     |
|--------|--------------------------------------------------|--------|---|-------|-----|
|        | PEG <sub>1000</sub>                              | 43.98  | t | 40.01 | t/h |
|        | Ti(OC <sub>4</sub> H <sub>9</sub> ) <sub>4</sub> | 1.388  | t | 1.26  | t/h |
| Output | TPAE                                             | 137.42 | t | 125   | t/h |

The mass flow rate (t/h) of rPA6 is converted according to the ratio, i.e:

The mass flow rate (t/h) of rPA6 = 100 t/137.42 t\*125 t/h

Other substances as above.

**Table S19** Energy flow data (Study Case).

|       | Parameters                                           | Value | Units | Ref |
|-------|------------------------------------------------------|-------|-------|-----|
| Input | Power consumption (Full mixing kettle)               | 5750  | kw    | a   |
|       | Power consumption (Intermittent stirred-tank kettle) | 2300  | kw    | b   |

a: Power consumption (Full mixing kettle) = Reference power (23 kw)\*The volume of full mixing kettle (25 m<sup>3</sup>)/The volume of reference kettle (10 m<sup>3</sup>)\*No. of equipment (100).

b: Power consumption (Intermittent stirred-tank kettle) = Reference power (23 kw)\*The volume of intermittent stirred-tank kettle (10 m<sup>3</sup>)/The volume of reference kettle (10 m<sup>3</sup>)\*No. of equipment (100).

**Table S20** Logistics data (Comparison Case).

| □      | Parameters                                       | Value | Units | Value | Units | Note |
|--------|--------------------------------------------------|-------|-------|-------|-------|------|
|        | CL                                               | 7.9   | t     | 79    | t/h   | a    |
| Input  | AA                                               | 0.58  | t     | 5.8   | t/h   |      |
|        | PEG <sub>1000</sub>                              | 4     | t     | 40    | t/h   |      |
|        | Ti(OC <sub>4</sub> H <sub>9</sub> ) <sub>4</sub> | 0.13  | t     | 1.3   | t/h   |      |
| Output | TPAE                                             | 12.5  | t     | 125   | t/h   |      |

The mass flow rate (t/h) of CL is converted according to the ratio, i.e:

The mass flow rate (t/h) of CL = 7.9 t/12.5 t\*125 t/h

Other substances as above.

**Table S21** Energy flow data (Comparison Case).

|       | Parameters                                           | Value | Units | Ref |
|-------|------------------------------------------------------|-------|-------|-----|
| Input | Power consumption (Intermittent stirred-tank kettle) | 3450  | kw    | a   |

a: Power consumption (Intermittent stirred-tank kettle) = Reference power (23 kw)\*The volume of intermittent stirred-tank kettle (15 m<sup>3</sup>)/The volume of reference kettle (10 m<sup>3</sup>)\*No. of equipment (100).

### 2.3.3. Total cost of production

**Table S22** Cost summary (Study Case).

| Parameters                                       | \$/y       | \$/t TPAE |
|--------------------------------------------------|------------|-----------|
| Fixed capital investment(FCI)                    | 48312016   | 48        |
| Fixed costs of production(FCOP)                  | 17165888   | 17        |
| Total Utilities (UTS)                            | 270480000  | 270       |
| rPA6                                             | 291078446  | 291       |
| EG                                               | 27113957   | 27        |
| H <sub>3</sub> PO <sub>4</sub>                   | 478460     | 0.5       |
| HMDA                                             | 92055135   | 92        |
| DMA                                              | 197560763  | 198       |
| PEG <sub>1000</sub>                              | 358445641  | 358       |
| Ti(OC <sub>4</sub> H <sub>9</sub> ) <sub>4</sub> | 32078940   | 32        |
| Total Cost of Production                         | 1334769246 | 1334      |

**Table S23** Cost summary (Comparison Case).

| Parameters                                       | \$/y       | \$/t TPAE |
|--------------------------------------------------|------------|-----------|
| Fixed capital investment                         | 22060679   | 22        |
| Fixed costs of production(FCOP)                  | 9250531    | 9         |
| Total Utilities (UTS)                            | 115920000  | 116       |
| CL                                               | 1202188000 | 1202      |
| AA                                               | 64264000   | 64        |
| PEG <sub>1000</sub>                              | 358400000  | 358       |
| Ti(OC <sub>4</sub> H <sub>9</sub> ) <sub>4</sub> | 33030400   | 33        |
| Total Cost of Production                         | 1805113610 | 1805      |

## References

1. A. Fivga and I. Dimitriou, *Energy*, 2018, 149, 865-874.
2. A.-J. Minor, R. Goldhahn, L. Rihko-Struckmann and K. Sundmacher, *Chemical Engineering Journal*, 2023, 474, 145333.
3. <https://v.toocle.com/100739/news-detail-7719074.html>.
4. <https://www.chemanalyst.com/Pricing-data/phosphoric-acid-1162>.
5. [https://www.chemicalbook.com/PriceInfoall\\_CB7204696.htm](https://www.chemicalbook.com/PriceInfoall_CB7204696.htm).
6. [https://www.chemicalbook.com/priceindex\\_cb1412954.htm](https://www.chemicalbook.com/priceindex_cb1412954.htm).
7. <https://www.100ppi.com/news/detail-20241112-3824211.html>.
8. <https://www.chemanalyst.com/Pricing-data/polyethylene-glycol-peg-1171>.
9. G. Ferrara, A. Lanzini, P. Leone, M. T. Ho and D. E. Wiley, *Energy*, 2017, 130, 113-128.
10. R. Sinnott and G. Towler, in *Chemical Engineering Design (Sixth Edition)*, eds. R. Sinnott and G. Towler, Butterworth-Heinemann, 2020, pp. 275-369.
11. <https://www.chemanalyst.com/Pricing-data/adipic-acid-1106>.
12. <https://www.chemanalyst.com/Pricing-data/caprolactam-67>.
13. D. R. L. Warren D. Seider, J. D. Seader, Soemantri Widagdo, Rafiqul Gani, Ka Ming Ng, *Product and Process Design Principles: Synthesis, Analysis, and Evaluation*, 2020.
14. G. Towler; and R. Sinnott, *Chemical Engineering Design: Principles, Practice and Economics of Plant and Process Design*, Butterworth-Heinemann, 2021.
15. J. Sisler, S. Khan, A. H. Ip, M. W. Schreiber, S. A. Jaffer, E. R. Bobicki, C.-T. Dinh and E.

- H. Sargent, *ACS Energy Letters*, 2021, 6, 997-1002.
16. R. Turton, R. C. Bailie, W. B. Whiting and J. A. Shaeiwitz, *Analysis, synthesis and design of chemical processes*, Pearson Education, 2008.
17. W. D. Seider, D. R. Lewin, J. Seader, S. Widagdo, R. Gani and K. M. Ng, *Product and process design principles: synthesis, analysis, and evaluation*, John Wiley & Sons, 2017.
